# Supplementary material for: Sex differences in systemic metabolites at four life stages: cohort study with repeated metabolomics
Source: BMC Med. 2021 Feb 24;19:58. doi: 10.1186/s12916-021-01929-2 (PMC7903597; doi:10.1186/s12916-021-01929-2)
Supplement: Supplementary file 3 — Additional file 3: Supplementary Table 2. Descriptive characteristics of participating ALSPAC mothers based on partners’ participation status. [file 12916_2021_1929_MOESM3_ESM.xlsx]

## Sheet: Additional File 3
Supplementary Table 2 Descriptive characteristics of participating ALSPAC mothers based on partners' participation status
	Partner participated			Partner did not participate
Characteristics of participating mothers	N			N
Age (y) on first occasion - mean (SD)	1435	48.5 (4.2)		3070	47.6 (4.5)
Non-white ethnicity – % (N)	1349	<5.0 (NA)		2733	<5.0 (NA)
Highest maternal education – % (N)	1352			2744
Certificate of Secondary Education		6.3 (85)			12.1 (333)
Vocational		5.3 (71)			8.6 (235)
Ordinary level		30.5 (412)			36.6 (1003)
Advanced level		32.8 (443)			27.3 (749)
Degree		25.2 (341)			15.5 (424)
BMI on first clinic occasion – mean (SD)	1430	26.1 (5.1)		3059	26.8 (5.5)
Maternal pre-pregnancy BMI – mean (SD)	1283	22.3 (3.3)		2577	22.6 (3.5)
Maternal smoking during pregnancy – % (N)	1258	11.1 (139)		2528	20.5 (519)
Menopause status (STRAW) – % (N)	1130			2282
Pre-menopause		60.4 (683)			63.1 (1439)
Peri-menopause		20.2 (228)			18.8 (430)
Post-menopause		19.4 (219)			18.1 (413)
"NA" indicates cell has been censored due to small cell counts in accordance with study ethics
