# Supplementary material for: Sex differences in systemic metabolites at four life stages: cohort study with repeated metabolomics
Source: BMC Med. 2021 Feb 24;19:58. doi: 10.1186/s12916-021-01929-2 (PMC7903597; doi:10.1186/s12916-021-01929-2)
Supplement: Supplementary file 11 — Additional file 11: Supplementary Table 10. Sex differences in metabolites in middle adulthood among ALSPAC parents, with menopausal comparisons and BMI adjustment. [file 12916_2021_1929_MOESM11_ESM.xlsx]

## Sheet: Additional File 11
Supplementary Table 10 Sex differences in metabolites in middle adulthood among ALSPAC parents, with menopausal comparisons and BMI adjustment
	Among parents (G0)
	Difference for males vs. females pre-menopause						Difference for males vs. females post-menopause
	in middle adulthood (age 50y)						in middle adulthood (age 50y)
	Adj. for centred age, sex*centred age,						Adj. for centred age, sex*centred age,
	centred BMI, sex*centred BMI						centred BMI, sex*centred BMI
Standardized metabolite outcome	N	Beta	LCL	UCL	P-value		N	Beta	LCL	UCL	P-value
Concentration of chylomicrons and extremely large VLDL particles	4736	0.583148	0.502869	0.663427	0		3182	0.551359	0.473725	0.628993	0
Total lipids in chylomicrons and extremely large VLDL	4738	0.462288	0.381214	0.543363	1.18e-28		3183	0.427421	0.349228	0.505614	2.36e-26
Phospholipids in chylomicrons and extremely large VLDL	4738	0.374165	0.291378	0.456952	1.11e-18		3183	0.339014	0.259144	0.418884	1.26e-16
Total cholesterol in chylomicrons and extremely large VLDL	4737	0.379386	0.297321	0.461451	1.82e-19		3183	0.340764	0.260835	0.420693	9.32e-17
Cholesterol esters in chylomicrons and extremely large VLDL	4736	0.421983	0.339676	0.504289	1.56e-23		3182	0.375845	0.295139	0.456551	1.18e-19
Free cholesterol in chylomicrons and extremely large VLDL	4737	0.317169	0.23534	0.398997	3.58e-14		3183	0.287118	0.208089	0.366146	1.3e-12
Triglycerides in chylomicrons and extremely large VLDL	4738	0.496378	0.415916	0.57684	3.48e-33		3183	0.462703	0.385301	0.540106	4.31e-31
Concentration of very large VLDL particles	4753	0.6718	0.591809	0.75179	0		3198	0.648911	0.571671	0.726151	0
Total lipids in very large VLDL	4753	0.590972	0.510862	0.671082	0		3198	0.564073	0.486751	0.641396	0
Phospholipids in very large VLDL	4751	0.521571	0.440385	0.602758	8.39e-36		3197	0.488812	0.410422	0.567202	1.26e-33
Total cholesterol in very large VLDL	4752	0.413128	0.332154	0.494103	2.53e-23		3198	0.377287	0.298454	0.45612	1.17e-20
Cholesterol esters in very large VLDL	4752	0.518967	0.438524	0.59941	4.38e-36		3198	0.486613	0.408003	0.565223	3.57e-33
Free cholesterol in very large VLDL	4751	0.287259	0.205941	0.368577	4.93e-12		3197	0.247742	0.168938	0.326546	7.98e-10
Triglycerides in very large VLDL	4752	0.658336	0.578899	0.737773	0		3197	0.635999	0.559542	0.712456	0
Concentration of large VLDL particles	5035	0.725768	0.651298	0.800237	0		3480	0.700262	0.628338	0.772186	0
Total lipids in large VLDL	5035	0.660672	0.586039	0.735305	0		3480	0.632617	0.560546	0.704689	0
Phospholipids in large VLDL	5035	0.660828	0.586244	0.735413	0		3480	0.629056	0.557045	0.701066	0
Total cholesterol in large VLDL	5035	0.541091	0.465318	0.616863	0		3480	0.504592	0.430899	0.578286	0
Cholesterol esters in large VLDL	5035	0.614706	0.540497	0.688915	0		3480	0.575833	0.503127	0.648539	0
Free cholesterol in large VLDL	5035	0.463533	0.386305	0.540761	1.5e-31		3480	0.429804	0.355243	0.504366	4.11e-29
Triglycerides in large VLDL	5035	0.70285	0.628684	0.777017	0		3480	0.679251	0.607825	0.750677	0
Concentration of medium VLDL particles	5158	0.709351	0.637603	0.7811	0		3603	0.675034	0.605144	0.744923	0
Total lipids in medium VLDL	5158	0.590845	0.518684	0.663005	0		3603	0.552076	0.481688	0.622465	0
Phospholipids in medium VLDL	5158	0.576506	0.504488	0.648523	0		3603	0.531842	0.461602	0.602082	0
Total cholesterol in medium VLDL	5158	0.360353	0.287608	0.433097	4.17e-22		3603	0.303263	0.231554	0.374971	1.56e-16
Cholesterol esters in medium VLDL	5158	0.248103	0.17586	0.320347	1.85e-11		3603	0.178841	0.107009	0.250674	1.1e-06
Free cholesterol in medium VLDL	5158	0.469525	0.39635	0.542701	9.21e-36		3603	0.427802	0.356458	0.499146	2.43e-31
Triglycerides in medium VLDL	5158	0.689744	0.618049	0.761439	0		3603	0.661588	0.592015	0.731161	0
Concentration of small VLDL particles	5157	0.416885	0.346997	0.486773	3.38e-31		3602	0.35548	0.287013	0.423946	5.16e-24
Total lipids in small VLDL	5157	0.0232453	-0.0463298	0.0928203	0.512507		3602	-0.0560983	-0.124344	0.0121475	0.107128
Phospholipids in small VLDL	5157	0.0536953	-0.0149368	0.122328	0.125149		3602	-0.0276353	-0.0947405	0.0394699	0.419476
Total cholesterol in small VLDL	5157	-0.672263	-0.737281	-0.607245	0		3602	-0.786882	-0.851129	-0.722635	0
Cholesterol esters in small VLDL	5157	-0.880831	-0.943564	-0.818098	0		3602	-1.00333	-1.06561	-0.941042	0
Free cholesterol in small VLDL	5157	-0.220725	-0.289029	-0.15242	2.57e-10		3602	-0.308016	-0.374877	-0.241155	2.68e-19
Triglycerides in small VLDL	5157	0.537996	0.468505	0.607486	0		3602	0.497996	0.430179	0.565814	0
Concentration of very small VLDL particles	5158	-0.294397	-0.366093	-0.222701	1.02e-15		3603	-0.415627	-0.486161	-0.345092	2.43e-30
Total lipids in very small VLDL	5158	-1.02574	-1.08817	-0.963307	0		3603	-1.1516	-1.21302	-1.09017	0
Phospholipids in very small VLDL	5158	-0.742955	-0.810107	-0.675803	0		3603	-0.88442	-0.949627	-0.819213	0
Total cholesterol in very small VLDL	5158	-1.36671	-1.42206	-1.31137	0		3603	-1.48339	-1.53874	-1.42804	0
Cholesterol esters in very small VLDL	5158	-1.43218	-1.48599	-1.37837	0		3603	-1.53725	-1.59121	-1.4833	0
Free cholesterol in very small VLDL	5158	-1.14407	-1.2039	-1.08424	0		3603	-1.28268	-1.34222	-1.22314	0
Triglycerides in very small VLDL	5158	-0.0684171	-0.137463	0.0006288	0.0521223		3603	-0.131306	-0.19852	-0.0640912	0.0001303
Concentration of IDL particles	5158	-0.0363244	-0.112384	0.0397352	0.349186		3603	-0.161378	-0.235352	-0.0874042	1.94e-05
Total lipids in IDL	5158	-0.852428	-0.918882	-0.785975	0		3603	-0.986929	-1.05141	-0.922452	0
Phospholipids in IDL	5158	-0.744512	-0.812734	-0.676291	0		3603	-0.875446	-0.941147	-0.809745	0
Total cholesterol in IDL	5158	-0.891019	-0.956622	-0.825416	0		3603	-1.02825	-1.09235	-0.964144	0
Cholesterol esters in IDL	5158	-0.893731	-0.959166	-0.828295	0		3603	-1.03196	-1.09614	-0.967779	0
Free cholesterol in IDL	5158	-0.863733	-0.930317	-0.797148	0		3603	-0.995181	-1.05964	-0.930717	0
Triglycerides in IDL	5158	-0.520435	-0.589654	-0.451216	0		3603	-0.593485	-0.659605	-0.527365	0
Concentration of large LDL particles	5158	0.301283	0.226447	0.376119	3.59e-15		3603	0.171636	0.0991873	0.244085	3.52e-06
Total lipids in large LDL	5158	-0.520047	-0.589643	-0.450451	0		3603	-0.662031	-0.72918	-0.594883	0
Phospholipids in large LDL	5158	-0.565573	-0.634705	-0.496441	0		3603	-0.708469	-0.775189	-0.641749	0
Total cholesterol in large LDL	5158	-0.464461	-0.534313	-0.394608	3.09e-38		3603	-0.609223	-0.676876	-0.541569	0
Cholesterol esters in large LDL	5158	-0.407198	-0.477185	-0.337211	8.84e-30		3603	-0.552621	-0.620428	-0.484815	0
Free cholesterol in large LDL	5158	-0.63347	-0.702735	-0.564204	0		3603	-0.774	-0.841003	-0.706997	0
Triglycerides in large LDL	5158	-0.718192	-0.787356	-0.649027	0		3603	-0.791271	-0.856057	-0.726485	0
Concentration of medium LDL particles	5155	0.474433	0.401072	0.547794	2.71e-36		3600	0.3466	0.275856	0.417344	1.37e-21
Total lipids in medium LDL	5155	-0.308831	-0.379152	-0.238509	9.62e-18		3600	-0.456255	-0.523657	-0.388853	0
Phospholipids in medium LDL	5155	-0.415153	-0.484475	-0.345831	1.98e-31		3600	-0.567074	-0.633746	-0.500402	0
Total cholesterol in medium LDL	5155	-0.259405	-0.330061	-0.188749	7.02e-13		3600	-0.408556	-0.476553	-0.340558	1.86e-31
Cholesterol esters in medium LDL	5155	-0.175039	-0.245775	-0.104304	1.26e-06		3600	-0.32207	-0.390147	-0.253993	2.97e-20
Free cholesterol in medium LDL	5155	-0.616231	-0.685067	-0.547394	0		3600	-0.767553	-0.834263	-0.700842	0
Triglycerides in medium LDL	5154	-0.393925	-0.464916	-0.322933	2.89e-27		3600	-0.458937	-0.524188	-0.393687	0
Concentration of small LDL particles	5155	0.370287	0.294759	0.445814	1.09e-21		3600	0.237959	0.165259	0.31066	1.57e-10
Total lipids in small LDL	5155	-0.377151	-0.447488	-0.306813	1.38e-25		3600	-0.527627	-0.594873	-0.460381	0
Phospholipids in small LDL	5155	-0.504146	-0.57442	-0.433873	0		3600	-0.656962	-0.724319	-0.589605	0
Total cholesterol in small LDL	5155	-0.35116	-0.421679	-0.28064	2.55e-22		3600	-0.50286	-0.570551	-0.435168	0
Cholesterol esters in small LDL	5155	-0.237581	-0.308326	-0.166837	5.05e-11		3600	-0.385836	-0.453603	-0.31807	1.81e-28
Free cholesterol in small LDL	5155	-0.804745	-0.87174	-0.737751	0		3600	-0.959337	-1.02556	-0.893112	0
Triglycerides in small LDL	5154	-0.126175	-0.197425	-0.0549246	0.0005215		3600	-0.194875	-0.261597	-0.128152	1.11e-08
Concentration of very large HDL particles	5086	-0.971767	-1.02825	-0.91528	0		3531	-0.940276	-0.995413	-0.885139	0
Total lipids in very large HDL	5086	-1.18039	-1.23196	-1.12881	0		3531	-1.15864	-1.20914	-1.10813	0
Phospholipids in very large HDL	5086	-1.04801	-1.10268	-0.993342	0		3531	-1.01191	-1.06534	-0.958489	0
Total cholesterol in very large HDL	5086	-1.26538	-1.31449	-1.21626	0		3531	-1.26035	-1.30965	-1.21104	0
Cholesterol esters in very large HDL	5086	-1.29067	-1.33896	-1.24238	0		3531	-1.28936	-1.33839	-1.24033	0
Free cholesterol in very large HDL	5086	-1.16247	-1.21445	-1.1105	0		3531	-1.14736	-1.19847	-1.09624	0
Triglycerides in very large HDL	5086	-0.755665	-0.823082	-0.688248	0		3531	-0.726174	-0.791789	-0.660559	0
Concentration of large HDL particles	5110	-0.953678	-1.01464	-0.892716	0		3555	-0.91714	-0.976877	-0.857403	0
Total lipids in large HDL	5110	-1.19818	-1.25212	-1.14424	0		3555	-1.16133	-1.21402	-1.10863	0
Phospholipids in large HDL	5110	-1.22927	-1.28428	-1.17426	0		3555	-1.20152	-1.25546	-1.14758	0
Total cholesterol in large HDL	5110	-1.14838	-1.20204	-1.09472	0		3555	-1.10666	-1.15909	-1.05424	0
Cholesterol esters in large HDL	5110	-1.14823	-1.20181	-1.09465	0		3555	-1.10514	-1.15748	-1.0528	0
Free cholesterol in large HDL	5110	-1.14684	-1.20081	-1.09286	0		3555	-1.10999	-1.16276	-1.05722	0
Triglycerides in large HDL	5110	-1.19429	-1.24915	-1.13943	0		3555	-1.14134	-1.19351	-1.08918	0
Concentration of medium HDL particles	5156	0.347955	0.272636	0.423273	1.87e-19		3601	0.3121	0.237898	0.386303	2.26e-16
Total lipids in medium HDL	5156	-1.05472	-1.12092	-0.988527	0		3601	-1.0901	-1.15517	-1.02503	0
Phospholipids in medium HDL	5156	-1.06031	-1.12637	-0.994255	0		3601	-1.09742	-1.1623	-1.03255	0
Total cholesterol in medium HDL	5156	-1.09213	-1.15725	-1.027	0		3601	-1.12371	-1.18815	-1.05926	0
Cholesterol esters in medium HDL	5156	-1.04592	-1.11142	-0.980422	0		3601	-1.07257	-1.13759	-1.00755	0
Free cholesterol in medium HDL	5156	-1.21215	-1.27584	-1.14846	0		3601	-1.25828	-1.32085	-1.19571	0
Triglycerides in medium HDL	5156	0.327177	0.260068	0.394286	1.81e-21		3601	0.309732	0.243493	0.37597	7.92e-20
Concentration of small HDL particles	5158	1.16719	1.10424	1.23014	0		3603	1.12498	1.06328	1.18668	0
Total lipids in small HDL	5158	-0.348254	-0.419333	-0.277174	1.15e-21		3603	-0.440803	-0.50959	-0.372016	1.83e-35
Phospholipids in small HDL	5158	-0.703677	-0.771079	-0.636275	0		3603	-0.72051	-0.786605	-0.654415	0
Total cholesterol in small HDL	5158	0.0316916	-0.0446561	0.108039	0.415818		3603	-0.115388	-0.188594	-0.0421819	0.0020145
Cholesterol esters in small HDL	5158	0.311782	0.236385	0.387178	6.44e-16		3603	0.167141	0.0948552	0.239427	5.99e-06
Free cholesterol in small HDL	5158	-1.16961	-1.23198	-1.10723	0		3603	-1.21735	-1.27917	-1.15553	0
Triglycerides in small HDL	5158	0.689241	0.624304	0.754179	0		3603	0.678909	0.615591	0.742227	0
Phospholipids to total lipds ratio in chylomicrons and extremely large VLDL	4732	-0.085418	-0.118778	-0.0520576	5.37e-07		3180	-0.122979	-0.191258	-0.0546995	0.0004191
Total cholesterol to total lipids ratio in chylomicrons and extremely large VLDL	4734	-0.0629847	-0.112911	-0.0130581	0.0134252		3181	-0.0782951	-0.132417	-0.0241728	0.004591
Cholesterol esters to total lipids ratio in chylomicrons and extremely large VLDL	4729	-0.145599	-0.184437	-0.106761	2.33e-13		3177	-0.153492	-0.202865	-0.104119	1.22e-09
Free cholesterol to total lipids ratio in chylomicrons and extremely large VLDL	4733	-0.0795426	-0.125496	-0.0335891	0.0006959		3180	-0.0943407	-0.143717	-0.0449648	0.0001827
Triglycerides to total lipids ratio in chylomicrons and extremely large VLDL	4732	0.281656	0.228838	0.334474	2.64e-25		3181	0.269398	0.218182	0.320615	1.49e-24
Phospholipids to total lipds ratio in very large VLDL	4740	-0.0366994	-0.0921228	0.018724	0.1943		3194	-0.0471454	-0.0933278	-0.000963	0.0454131
Total cholesterol to total lipids ratio in very large VLDL	4739	-0.217883	-0.258472	-0.177294	1.28e-25		3195	-0.237621	-0.299629	-0.175614	7.42e-14
Cholesterol esters to total lipids ratio in very large VLDL	4737	-0.06785	-0.0940902	-0.0416099	4.15e-07		3194	-0.0411598	-0.0525702	-0.0297495	1.86e-12
Free cholesterol to total lipids ratio in very large VLDL	4733	-0.186478	-0.288984	-0.0839728	0.0003654		3193	-0.172802	-0.224306	-0.121299	5.54e-11
Triglycerides to total lipids ratio in very large VLDL	4741	0.0202246	-0.0194686	0.0599177	0.317893		3191	0.0322563	0.0097972	0.0547153	0.0048921
Phospholipids to total lipds ratio in large VLDL	5034	0.234125	0.183613	0.284638	1.44e-19		3480	0.186022	0.137664	0.23438	5.87e-14
Total cholesterol to total lipids ratio in large VLDL	5035	-0.17578	-0.235071	-0.11649	6.55e-09		3480	-0.206874	-0.26555	-0.148198	5.64e-12
Cholesterol esters to total lipids ratio in large VLDL	5035	-0.18882	-0.246099	-0.131541	1.13e-10		3480	-0.185866	-0.242647	-0.129085	1.57e-10
Free cholesterol to total lipids ratio in large VLDL	5034	-0.083065	-0.143531	-0.0225989	0.0071018		3480	-0.128846	-0.184051	-0.0736398	4.91e-06
Triglycerides to total lipids ratio in large VLDL	5035	-0.0519625	-0.125786	0.0218614	0.16768		3480	-0.0046823	-0.0472104	0.0378459	0.829106
Phospholipids to total lipds ratio in medium VLDL	5158	-0.571445	-0.633573	-0.509318	0		3603	-0.634647	-0.693313	-0.575982	0
Total cholesterol to total lipids ratio in medium VLDL	5158	-0.914113	-0.972253	-0.855973	0		3603	-0.933832	-0.990686	-0.876978	0
Cholesterol esters to total lipids ratio in medium VLDL	5158	-0.833907	-0.892226	-0.775589	0		3603	-0.844523	-0.900481	-0.788565	0
Free cholesterol to total lipids ratio in medium VLDL	5158	-0.307168	-0.371452	-0.242883	1.08e-20		3603	-0.348602	-0.409745	-0.287459	1.53e-28
Triglycerides to total lipids ratio in medium VLDL	5158	0.930109	0.8726	0.987617	0		3603	0.95122	0.895393	1.00705	0
Phospholipids to total lipds ratio in small VLDL	5157	0.191501	0.117395	0.265606	4.2e-07		3602	0.222931	0.149064	0.296798	3.58e-09
Total cholesterol to total lipids ratio in small VLDL	5157	-1.53566	-1.58563	-1.48569	0		3602	-1.58492	-1.63365	-1.53619	0
Cholesterol esters to total lipids ratio in small VLDL	5157	-1.43485	-1.48774	-1.38196	0		3602	-1.48483	-1.53653	-1.43314	0
Free cholesterol to total lipids ratio in small VLDL	5157	-1.54849	-1.59816	-1.49883	0		3602	-1.57131	-1.62105	-1.52157	0
Triglycerides to total lipids ratio in small VLDL	5157	1.51344	1.46459	1.56229	0		3602	1.55493	1.50776	1.60211	0
Phospholipids to total lipds ratio in very small VLDL	5158	1.05457	0.989086	1.12005	0		3603	0.993454	0.928788	1.05812	0
Total cholesterol to total lipids ratio in very small VLDL	5158	-1.49707	-1.55003	-1.44411	0		3603	-1.49659	-1.54801	-1.44516	0
Cholesterol esters to total lipids ratio in very small VLDL	5158	-1.5034	-1.55768	-1.44913	0		3603	-1.4899	-1.54322	-1.43658	0
Free cholesterol to total lipids ratio in very small VLDL	5158	-0.842897	-0.910241	-0.775552	0		3603	-0.897828	-0.96187	-0.833785	0
Triglycerides to total lipids ratio in very small VLDL	5158	1.15076	1.08753	1.21399	0		3603	1.17771	1.11665	1.23877	0
Phospholipids to total lipds ratio in IDL	5158	1.07293	1.00168	1.14418	0		3603	1.11367	1.04199	1.18536	0
Total cholesterol to total lipids ratio in IDL	5158	-0.810223	-0.880325	-0.740121	0		3603	-0.861059	-0.93011	-0.792008	0
Cholesterol esters to total lipids ratio in IDL	5158	-0.759157	-0.83221	-0.686104	0		3603	-0.810066	-0.882992	-0.737141	0
Free cholesterol to total lipids ratio in IDL	5158	-0.391742	-0.469318	-0.314167	6.67e-23		3603	-0.408815	-0.484998	-0.332632	1.61e-25
Triglycerides to total lipids ratio in IDL	5158	0.425962	0.355535	0.496389	5.14e-32		3603	0.464326	0.396469	0.532182	0
Phospholipids to total lipds ratio in large LDL	5158	0.283153	0.200895	0.365411	1.66e-11		3603	0.361113	0.280241	0.441985	3.09e-18
Total cholesterol to total lipids ratio in large LDL	5158	0.0189537	-0.0575433	0.0954506	0.627176		3603	-0.0631108	-0.137799	0.0115776	0.0976668
Cholesterol esters to total lipids ratio in large LDL	5158	0.164098	0.0869405	0.241256	3.1e-05		3603	0.0691805	-0.0063497	0.144711	0.0726106
Free cholesterol to total lipids ratio in large LDL	5158	-0.403187	-0.476478	-0.329896	7.85e-27		3603	-0.354222	-0.425365	-0.28308	3.09e-22
Triglycerides to total lipids ratio in large LDL	5158	-0.269943	-0.338347	-0.20154	1.22e-14		3603	-0.214723	-0.280409	-0.149037	1.65e-10
Phospholipids to total lipds ratio in medium LDL	5155	-0.0335764	-0.103694	0.036541	0.347894		3600	0.0381678	-0.0303417	0.106677	0.274775
Total cholesterol to total lipids ratio in medium LDL	5155	0.0745911	0.001746	0.147436	0.0447578		3600	-0.013697	-0.0841035	0.0567095	0.702912
Cholesterol esters to total lipids ratio in medium LDL	5155	0.230988	0.161454	0.300522	8.1e-11		3600	0.14062	0.0732442	0.207996	4.37e-05
Free cholesterol to total lipids ratio in medium LDL	5155	-0.470013	-0.531128	-0.408899	0		3600	-0.38937	-0.449666	-0.329074	5.64e-36
Triglycerides to total lipids ratio in medium LDL	5154	-0.104673	-0.174723	-0.0346232	0.0034111		3600	-0.0370684	-0.103905	0.0297682	0.276939
Phospholipids to total lipds ratio in small LDL	5155	0.0267648	-0.0434167	0.0969462	0.454713		3600	0.112588	0.0447577	0.180419	0.0011471
Total cholesterol to total lipids ratio in small LDL	5155	-0.139528	-0.213941	-0.0651162	0.0002394		3600	-0.226554	-0.29825	-0.154859	6.47e-10
Cholesterol esters to total lipids ratio in small LDL	5155	0.159885	0.0891251	0.230644	9.63e-06		3600	0.0676661	-0.0004774	0.13581	0.0516261
Free cholesterol to total lipids ratio in small LDL	5155	-0.74745	-0.804036	-0.690865	0		3600	-0.677593	-0.733774	-0.621411	0
Triglycerides to total lipids ratio in small LDL	5154	0.293438	0.220699	0.366177	3.16e-15		3600	0.338727	0.268931	0.408523	3.22e-21
Phospholipids to total lipds ratio in very large HDL	5086	0.34545	0.264325	0.426576	8.86e-17		3531	0.394818	0.313957	0.475679	1.89e-21
Total cholesterol to total lipids ratio in very large HDL	5086	-0.632499	-0.706961	-0.558037	0		3531	-0.680633	-0.754527	-0.606739	0
Cholesterol esters to total lipids ratio in very large HDL	5086	-0.5194	-0.594759	-0.444041	0		3531	-0.566458	-0.641247	-0.491669	0
Free cholesterol to total lipids ratio in very large HDL	5086	-0.681466	-0.764008	-0.598924	0		3531	-0.69999	-0.78135	-0.61863	0
Triglycerides to total lipids ratio in very large HDL	5086	0.390549	0.326645	0.454453	1.22e-32		3531	0.372987	0.305174	0.4408	1.06e-26
Phospholipids to total lipds ratio in large HDL	5110	0.90624	0.841586	0.970894	0		3555	0.844233	0.780061	0.908404	0
Total cholesterol to total lipids ratio in large HDL	5110	-0.793347	-0.859283	-0.727412	0		3555	-0.742268	-0.808492	-0.676044	0
Cholesterol esters to total lipids ratio in large HDL	5110	-0.673976	-0.738703	-0.609249	0		3555	-0.614609	-0.680062	-0.549156	0
Free cholesterol to total lipids ratio in large HDL	5110	-0.957025	-1.02831	-0.885736	0		3555	-0.927542	-0.998561	-0.856522	0
Triglycerides to total lipids ratio in large HDL	5110	0.0416234	-0.0348072	0.118054	0.285737		3555	0.040652	-0.0354501	0.116754	0.295021
Phospholipids to total lipds ratio in medium HDL	5156	0.0071015	-0.0582277	0.0724307	0.831253		3601	-0.0091632	-0.0803389	0.0620124	0.800737
Total cholesterol to total lipids ratio in medium HDL	5156	-0.646389	-0.714327	-0.578451	0		3601	-0.637067	-0.706292	-0.567842	0
Cholesterol esters to total lipids ratio in medium HDL	5156	-0.260103	-0.328687	-0.19152	1.22e-13		3601	-0.232685	-0.303191	-0.162179	1.11e-10
Free cholesterol to total lipids ratio in medium HDL	5156	-1.44311	-1.50533	-1.38089	0		3601	-1.49257	-1.55353	-1.43161	0
Triglycerides to total lipids ratio in medium HDL	5156	0.970867	0.905476	1.03626	0		3601	0.967715	0.902558	1.03287	0
Phospholipids to total lipds ratio in small HDL	5158	-0.732243	-0.799572	-0.664913	0		3603	-0.607345	-0.672795	-0.541896	0
Total cholesterol to total lipids ratio in small HDL	5158	0.418597	0.345386	0.491808	7.91e-29		3603	0.288952	0.217746	0.360158	2.36e-15
Cholesterol esters to total lipids ratio in small HDL	5158	0.635647	0.564562	0.706732	0		3603	0.51142	0.44223	0.580611	0
Free cholesterol to total lipids ratio in small HDL	5158	-1.52729	-1.57523	-1.47934	0		3603	-1.46417	-1.51185	-1.41648	0
Triglycerides to total lipids ratio in small HDL	5158	0.91308	0.846854	0.979307	0		3603	0.92981	0.864699	0.994922	0
Mean diameter for VLDL particles	5158	1.01337	0.953066	1.07367	0		3603	1.01099	0.952662	1.06931	0
Mean diameter for LDL particles	5158	-0.935101	-1.00096	-0.869246	0		3603	-0.859786	-0.924908	-0.794664	0
Mean diameter for HDL particles	5158	-1.1632	-1.21836	-1.10805	0		3603	-1.11958	-1.17313	-1.06602	0
Serum total cholesterol	5158	-1.00563	-1.07072	-0.940546	0		3603	-1.14062	-1.20361	-1.07763	0
Total cholesterol in VLDL	5158	-0.413805	-0.48397	-0.34364	1.53e-30		3603	-0.512654	-0.582262	-0.443046	0
Remnant cholesterol (non-HDL, non-LDL -cholesterol)	5158	-0.677999	-0.745456	-0.610542	0		3603	-0.805102	-0.871682	-0.738522	0
Total cholesterol in LDL	5158	-0.382126	-0.452482	-0.311771	3.34e-26		3603	-0.529878	-0.597778	-0.461977	0
Total cholesterol in HDL	5158	-1.30683	-1.36113	-1.25253	0		3603	-1.31578	-1.36952	-1.26204	0
Total cholesterol in HDL2	5158	-1.16309	-1.22002	-1.10617	0		3603	-1.16017	-1.21655	-1.10379	0
Total cholesterol in HDL3	5158	-1.78575	-1.82534	-1.74615	0		3603	-1.85567	-1.89436	-1.81699	0
Esterified cholesterol	4999	-1.00899	-1.07457	-0.943397	0		3523	-1.14044	-1.20382	-1.07706	0
Free cholesterol	4998	-0.94124	-1.0085	-0.873982	0		3523	-1.09458	-1.15953	-1.02963	0
Serum total triglycerides	5158	0.394155	0.321301	0.46701	5.16e-26		3603	0.355976	0.285337	0.426614	9.84e-23
Triglycerides in VLDL	5158	0.567827	0.495473	0.640181	0		3603	0.535552	0.465462	0.605642	0
Triglycerides in LDL	5158	-0.521722	-0.592274	-0.45117	0		3603	-0.592912	-0.65864	-0.527184	0
Triglycerides in HDL	5158	-0.288469	-0.360765	-0.216173	6.25e-15		3603	-0.269492	-0.340379	-0.198606	1.13e-13
Diacylglycerol	4419	0.465555	0.375784	0.555326	5.1e-24		2982	0.396524	0.308855	0.484193	1.25e-18
Ratio of diacylglycerol to triglycerides	4418	0.551482	0.45663	0.646334	1.1e-29		2982	0.50203	0.406487	0.597572	1.75e-24
Total phosphoglycerides	4996	-1.13825	-1.20348	-1.07302	0		3523	-1.22022	-1.28226	-1.15819	0
Ratio of triglycerides to phosphoglycerides	4995	0.573982	0.50008	0.647885	0		3523	0.557523	0.484606	0.630441	0
Phosphatidylcholine and other cholines	4977	-1.3311	-1.39128	-1.27092	0		3508	-1.38719	-1.44486	-1.32951	0
Total cholines	4998	-1.28588	-1.34727	-1.22448	0		3524	-1.36812	-1.42667	-1.30957	0
Apolipoprotein A-I	5158	-1.44229	-1.49622	-1.38836	0		3603	-1.4894	-1.54228	-1.4365	0
Apolipoprotein B	5158	-0.432461	-0.502789	-0.362133	5.06e-33		3603	-0.555012	-0.623066	-0.486957	0
Ratio of apolipoprotein B to apolipoprotein A-I	5158	0.390529	0.320776	0.460283	1.01e-27		3603	0.302516	0.233892	0.371141	8.11e-18
Total fatty acids	4998	-0.869202	-0.939223	-0.799181	0		3523	-0.963584	-1.03125	-0.895917	0
Estimated description of fatty acid chain length, not actual carbon number	4998	0.985914	0.919857	1.05197	0		3523	1.00289	0.938856	1.06693	0
Estimated degree of unsaturation	4998	0.189113	0.115131	0.263095	5.59e-07		3523	0.19571	0.12243	0.26899	1.73e-07
22:6, docosahexaenoic acid	4999	-1.04177	-1.10881	-0.974725	0		3524	-1.06178	-1.12718	-0.996375	0
18:2, linoleic acid	4999	-0.966874	-1.03272	-0.901026	0		3523	-1.06073	-1.12418	-0.997285	0
Conjugated linoleic acid	4881	0.0644068	-0.0044517	0.133265	0.0667585		3406	0.0333481	-0.0348207	0.101517	0.33755
Omega-3 fatty acids	4999	-0.909456	-0.977445	-0.841466	0		3524	-0.953689	-1.02197	-0.885407	0
Omega-6 fatty acids	4999	-1.05347	-1.11867	-0.988258	0		3523	-1.15857	-1.22108	-1.09607	0
Polyunsaturated fatty acids	4999	-1.08252	-1.14788	-1.01715	0		3523	-1.18299	-1.2456	-1.12038	0
Monounsaturated fatty acids; 16:1, 18:1	4996	-0.424534	-0.498489	-0.350578	4.96e-29		3523	-0.527402	-0.600026	-0.454777	0
Saturated fatty acids	4996	-0.922393	-0.992669	-0.852117	0		3522	-0.987425	-1.05542	-0.919426	0
Ratio of 22:6 docosahexaenoic acid to total fatty acids	4998	-0.684656	-0.75419	-0.615121	0		3523	-0.626637	-0.695031	-0.558243	0
Ratio of 18:2 linoleic acid to total fatty acids	4998	-0.0945131	-0.167263	-0.0217634	0.0108978		3523	-0.0942025	-0.166534	-0.0218711	0.010707
Ratio of conjugated linoleic acid to total fatty acids	4879	0.292289	0.224447	0.36013	3.92e-17		3405	0.298524	0.234056	0.362992	1.81e-19
Ratio of omega-3 fatty acids to total fatty acids	4998	-0.388731	-0.458101	-0.319361	9.28e-28		3523	-0.343391	-0.413999	-0.272784	2.7e-21
Ratio of omega-6 fatty acids to total fatty acids	4998	-0.193617	-0.267933	-0.119302	3.38e-07		3523	-0.204918	-0.278616	-0.131219	5.34e-08
Ratio of polyunsaturated fatty acids to total fatty acids	4998	-0.287154	-0.360853	-0.213455	2.62e-14		3523	-0.285181	-0.357979	-0.212384	2.04e-14
Ratio of monounsaturated fatty acids to total fatty acids	4995	0.51509	0.441878	0.588303	0		3522	0.445627	0.372674	0.51858	2e-32
Ratio of saturated fatty acids to total fatty acids	4995	-0.421582	-0.500013	-0.343151	1.08e-25		3522	-0.300221	-0.376797	-0.223646	1.94e-14
Glucose	5152	-0.237427	-0.311878	-0.162976	4.38e-10		3599	-0.298137	-0.370442	-0.225831	8.47e-16
Lactate	5155	0.71828	0.65017	0.78639	0		3601	0.712509	0.644426	0.780592	0
Citrate	5155	1.30858	1.25289	1.36427	0		3601	1.28142	1.22757	1.33527	0
Alanine	5155	1.24853	1.19137	1.30569	0		3601	1.26887	1.21311	1.32462	0
Glutamine	5155	0.467433	0.399027	0.535839	0		3601	0.32545	0.259712	0.391187	5.25e-22
Histidine	5154	-0.008903	-0.0765321	0.058726	0.796355		3601	-0.0682926	-0.132021	-0.0045638	0.0357078
Isoleucine	5154	1.2482	1.18876	1.30763	0		3599	1.24297	1.18484	1.30109	0
Leucine	5154	1.49225	1.43436	1.55014	0		3600	1.48843	1.43122	1.54564	0
Valine	5154	0.620564	0.556188	0.68494	0		3599	0.528055	0.465358	0.590751	0
Phenylalanine	5154	1.43338	1.38365	1.4831	0		3601	1.40694	1.35747	1.45642	0
Tyrosine	5153	-0.139826	-0.206372	-0.0732796	3.86e-05		3601	-0.160302	-0.225969	-0.0946357	1.77e-06
Acetate	5155	-0.407417	-0.479595	-0.33524	3.8e-28		3601	-0.481021	-0.55192	-0.410122	0
Acetoacetate	0						0
3-hydroxybutyrate	5140	0.149078	0.0829837	0.215172	9.99e-06		3591	0.187421	0.124727	0.250115	5.01e-09
Creatinine	5153	0.489445	0.42093	0.55796	0		3598	0.434984	0.36821	0.501758	1.45e-36
Albumin (signal area)	5157	-0.586073	-0.652358	-0.519788	0		3602	-0.785039	-0.848463	-0.721616	0
Glycoprotein acetyls, mainly a1-acid glycoprotein	5155	-0.246271	-0.317871	-0.174671	1.72e-11		3601	-0.369298	-0.438939	-0.299657	5.76e-25
Complete case sample
Standardized outcome	N	Beta	LCL	UCL	P-value		N	Beta	LCL	UCL	P-value
Concentration of chylomicrons and extremely large VLDL particles	3980	0.711625	0.629213	0.794037	0		2571	0.67128	0.590245	0.752314	0
Total lipids in chylomicrons and extremely large VLDL	3980	0.591712	0.508399	0.675025	0		2571	0.548358	0.46665	0.630066	2.53e-38
Phospholipids in chylomicrons and extremely large VLDL	3980	0.506234	0.420936	0.591532	8.52e-31		2571	0.462808	0.379147	0.546469	7.76e-27
Total cholesterol in chylomicrons and extremely large VLDL	3980	0.515175	0.429286	0.601065	2.08e-31		2571	0.467988	0.383247	0.552729	9.4e-27
Cholesterol esters in chylomicrons and extremely large VLDL	3980	0.561373	0.473554	0.649193	2.29e-35		2571	0.508189	0.421231	0.595147	1.1e-29
Free cholesterol in chylomicrons and extremely large VLDL	3980	0.444477	0.360269	0.528685	8.75e-25		2571	0.405803	0.323143	0.488462	1.42e-21
Triglycerides in chylomicrons and extremely large VLDL	3980	0.623144	0.540845	0.705444	0		2571	0.580879	0.500296	0.661462	0
Concentration of very large VLDL particles	3980	0.802671	0.719854	0.885487	0		2571	0.771172	0.689837	0.852507	0
Total lipids in very large VLDL	3980	0.723139	0.640147	0.80613	0		2571	0.687334	0.605879	0.768789	0
Phospholipids in very large VLDL	3980	0.661101	0.576888	0.745314	0		2571	0.618827	0.536137	0.701517	0
Total cholesterol in very large VLDL	3980	0.552939	0.468497	0.637381	5.4e-37		2571	0.509127	0.425769	0.592485	3.35e-32
Cholesterol esters in very large VLDL	3980	0.659577	0.575425	0.74373	0		2571	0.620193	0.536922	0.703463	0
Free cholesterol in very large VLDL	3980	0.425395	0.34088	0.509911	1.04e-22		2571	0.376851	0.293681	0.460021	1.18e-18
Triglycerides in very large VLDL	3980	0.785951	0.703833	0.86807	0		2571	0.754501	0.674055	0.834947	0
Concentration of large VLDL particles	3980	1.01128	0.930315	1.09225	0		2571	0.977645	0.898059	1.05723	0
Total lipids in large VLDL	3980	0.945917	0.864967	1.02687	0		2571	0.909531	0.829969	0.989094	0
Phospholipids in large VLDL	3980	0.951709	0.870917	1.0325	0		2571	0.911378	0.831981	0.990776	0
Total cholesterol in large VLDL	3980	0.843979	0.761648	0.926311	0		2571	0.79971	0.718435	0.880986	0
Cholesterol esters in large VLDL	3980	0.920396	0.839616	1.00118	0		2571	0.874967	0.7949	0.955033	0
Free cholesterol in large VLDL	3980	0.760949	0.677084	0.844813	0		2571	0.718265	0.635816	0.800714	0
Triglycerides in large VLDL	3980	0.978865	0.898416	1.05931	0		2571	0.946733	0.867798	1.02567	0
Concentration of medium VLDL particles	3980	1.08507	1.00665	1.16349	0		2571	1.04464	0.967167	1.1221	0
Total lipids in medium VLDL	3980	0.967605	0.888954	1.04626	0		2571	0.92267	0.844906	1.00043	0
Phospholipids in medium VLDL	3980	0.957119	0.878858	1.03538	0		2571	0.90616	0.828795	0.983524	0
Total cholesterol in medium VLDL	3980	0.766759	0.688003	0.845514	0		2571	0.703462	0.625034	0.781891	0
Cholesterol esters in medium VLDL	3980	0.667548	0.589442	0.745654	0		2571	0.592367	0.514158	0.670575	0
Free cholesterol in medium VLDL	3980	0.846751	0.766968	0.926534	0		2571	0.798638	0.719769	0.877507	0
Triglycerides in medium VLDL	3980	1.0453	0.966727	1.12388	0		2571	1.01132	0.93391	1.08873	0
Concentration of small VLDL particles	3980	0.798933	0.724052	0.873814	0		2571	0.733993	0.659901	0.808086	0
Total lipids in small VLDL	3980	0.395137	0.32083	0.469444	3.99e-25		2571	0.312853	0.239329	0.386376	1.16e-16
Phospholipids in small VLDL	3980	0.400931	0.327198	0.474664	3.5e-26		2571	0.317039	0.244362	0.389716	2.01e-17
Total cholesterol in small VLDL	3980	-0.317152	-0.387138	-0.247166	9.54e-19		2571	-0.433335	-0.502747	-0.363923	1.57e-33
Cholesterol esters in small VLDL	3980	-0.546772	-0.615395	-0.478148	0		2571	-0.670093	-0.738325	-0.601862	0
Free cholesterol in small VLDL	3980	0.130134	0.0573065	0.202962	0.0004646		2571	0.0402487	-0.0316249	0.112122	0.272271
Triglycerides in small VLDL	3980	0.878005	0.802902	0.953107	0		2571	0.834394	0.760215	0.908574	0
Concentration of very small VLDL particles	3980	0.112837	0.0333725	0.192301	0.0053958		2571	-0.0093535	-0.0879506	0.0692437	0.815504
Total lipids in very small VLDL	3980	-0.705416	-0.774531	-0.6363	0		2571	-0.830114	-0.898297	-0.76193	0
Phospholipids in very small VLDL	3980	-0.433682	-0.509476	-0.357888	8.96e-29		2571	-0.579628	-0.653869	-0.505387	0
Total cholesterol in very small VLDL	3980	-1.11933	-1.18175	-1.05691	0		2571	-1.23095	-1.29285	-1.16905	0
Cholesterol esters in very small VLDL	3980	-1.19518	-1.25597	-1.13439	0		2571	-1.29575	-1.35634	-1.23516	0
Free cholesterol in very small VLDL	3980	-0.884696	-0.952043	-0.817349	0		2571	-1.01639	-1.08251	-0.950264	0
Triglycerides in very small VLDL	3980	0.262024	0.188452	0.335596	3.38e-12		2571	0.198071	0.125684	0.270457	8.79e-08
Concentration of IDL particles	3980	0.331792	0.244395	0.419189	1.2e-13		2571	0.201519	0.115795	0.287242	4.23e-06
Total lipids in IDL	3980	-0.573871	-0.64902	-0.498721	0		2571	-0.713415	-0.786932	-0.639897	0
Phospholipids in IDL	3980	-0.484204	-0.562017	-0.406392	1.23e-33		2571	-0.62217	-0.697894	-0.546445	0
Total cholesterol in IDL	3980	-0.624324	-0.698857	-0.549791	0		2571	-0.766059	-0.839328	-0.692791	0
Cholesterol esters in IDL	3980	-0.608242	-0.682126	-0.534358	0		2571	-0.750847	-0.823639	-0.678054	0
Free cholesterol in IDL	3980	-0.649539	-0.726236	-0.572843	0		2571	-0.785995	-0.860958	-0.711031	0
Triglycerides in IDL	3980	-0.238461	-0.313234	-0.163687	4.47e-10		2571	-0.313274	-0.385653	-0.240896	3.52e-17
Concentration of large LDL particles	3980	0.635307	0.548621	0.721994	0		2571	0.498351	0.41358	0.583122	5.18e-30
Total lipids in large LDL	3980	-0.249014	-0.328103	-0.169925	7.38e-10		2571	-0.397488	-0.47456	-0.320416	1.33e-23
Phospholipids in large LDL	3980	-0.291104	-0.369731	-0.212477	4.68e-13		2571	-0.441684	-0.51836	-0.365009	6.57e-29
Total cholesterol in large LDL	3980	-0.200643	-0.280484	-0.120801	8.69e-07		2571	-0.351791	-0.42979	-0.273793	1.68e-18
Cholesterol esters in large LDL	3980	-0.130231	-0.209839	-0.0506225	0.0013506		2571	-0.282417	-0.36019	-0.204643	1.39e-12
Free cholesterol in large LDL	3980	-0.414924	-0.495208	-0.33464	7.7e-24		2571	-0.560276	-0.638705	-0.481847	0
Triglycerides in large LDL	3980	-0.478623	-0.553598	-0.403649	2.81e-35		2571	-0.554732	-0.626119	-0.483344	0
Concentration of medium LDL particles	3980	0.78244	0.696626	0.868255	0		2571	0.646318	0.562609	0.730027	0
Total lipids in medium LDL	3980	-0.0538837	-0.134148	0.0263803	0.188188		2571	-0.20812	-0.285918	-0.130323	1.68e-07
Phospholipids in medium LDL	3980	-0.118894	-0.197132	-0.0406552	0.0029063		2571	-0.276996	-0.352877	-0.201115	1.06e-12
Total cholesterol in medium LDL	3980	-0.0198517	-0.101214	0.0615106	0.632421		2571	-0.175577	-0.254678	-0.0964757	1.4e-05
Cholesterol esters in medium LDL	3980	0.0645876	-0.0167725	0.145948	0.119695		2571	-0.0901704	-0.169256	-0.0110848	0.0254551
Free cholesterol in medium LDL	3980	-0.385342	-0.464806	-0.305878	3.28e-21		2571	-0.538886	-0.616171	-0.461601	0
Triglycerides in medium LDL	3980	-0.195384	-0.271533	-0.119235	5.11e-07		2571	-0.266996	-0.338556	-0.195437	3.39e-13
Concentration of small LDL particles	3980	0.687673	0.599013	0.776332	0		2571	0.549874	0.463495	0.636253	9.3e-35
Total lipids in small LDL	3980	-0.130061	-0.210257	-0.0498653	0.001486		2571	-0.286296	-0.363858	-0.208733	5.99e-13
Phospholipids in small LDL	3980	-0.227448	-0.306898	-0.147997	2.13e-08		2571	-0.385238	-0.462032	-0.308444	1.94e-22
Total cholesterol in small LDL	3980	-0.129322	-0.210679	-0.047965	0.0018436		2571	-0.286442	-0.365374	-0.20751	1.44e-12
Cholesterol esters in small LDL	3980	-0.0187119	-0.100186	0.0627621	0.652535		2571	-0.174131	-0.253059	-0.0952029	1.58e-05
Free cholesterol in small LDL	3980	-0.588835	-0.666028	-0.511642	0		2571	-0.740392	-0.815603	-0.66518	0
Triglycerides in small LDL	3980	0.160072	0.0845664	0.235577	3.3e-05		2571	0.0836831	0.0115894	0.155777	0.0229214
Concentration of very large HDL particles	3980	-1.03631	-1.09872	-0.973895	0		2571	-1.00318	-1.06446	-0.941902	0
Total lipids in very large HDL	3980	-1.2312	-1.28751	-1.17488	0		2571	-1.20513	-1.26046	-1.14979	0
Phospholipids in very large HDL	3980	-1.14945	-1.20938	-1.08953	0		2571	-1.11446	-1.17329	-1.05564	0
Total cholesterol in very large HDL	3980	-1.2794	-1.33293	-1.22588	0		2571	-1.26458	-1.31749	-1.21166	0
Cholesterol esters in very large HDL	3980	-1.2972	-1.34981	-1.24459	0		2571	-1.28429	-1.33635	-1.23222	0
Free cholesterol in very large HDL	3980	-1.19755	-1.25439	-1.1407	0		2571	-1.17845	-1.23458	-1.12231	0
Triglycerides in very large HDL	3980	-0.501234	-0.575942	-0.426526	1.03e-38		2571	-0.470446	-0.544179	-0.396712	6.63e-35
Concentration of large HDL particles	3980	-1.12108	-1.19022	-1.05195	0		2571	-1.08752	-1.15539	-1.01966	0
Total lipids in large HDL	3980	-1.32844	-1.38846	-1.26843	0		2571	-1.29413	-1.35284	-1.23541	0
Phospholipids in large HDL	3980	-1.36302	-1.42498	-1.30106	0		2571	-1.34013	-1.40089	-1.27937	0
Total cholesterol in large HDL	3980	-1.28684	-1.34607	-1.2276	0		2571	-1.24563	-1.30362	-1.18764	0
Cholesterol esters in large HDL	3980	-1.28354	-1.34266	-1.22441	0		2571	-1.24096	-1.29883	-1.18309	0
Free cholesterol in large HDL	3980	-1.2953	-1.35496	-1.23564	0		2571	-1.25882	-1.31728	-1.20035	0
Triglycerides in large HDL	3980	-1.14398	-1.20402	-1.08393	0		2571	-1.09483	-1.1521	-1.03755	0
Concentration of medium HDL particles	3980	0.296801	0.205615	0.387987	1.96e-10		2571	0.24766	0.157706	0.337614	7.33e-08
Total lipids in medium HDL	3980	-1.10296	-1.1813	-1.02463	0		2571	-1.15201	-1.22906	-1.07496	0
Phospholipids in medium HDL	3980	-1.08821	-1.16589	-1.01054	0		2571	-1.13502	-1.2112	-1.05885	0
Total cholesterol in medium HDL	3980	-1.20063	-1.27756	-1.12369	0		2571	-1.24683	-1.32287	-1.17078	0
Cholesterol esters in medium HDL	3980	-1.16253	-1.23999	-1.08506	0		2571	-1.20512	-1.28177	-1.12848	0
Free cholesterol in medium HDL	3980	-1.28812	-1.36271	-1.21352	0		2571	-1.34348	-1.41678	-1.27017	0
Triglycerides in medium HDL	3980	0.6215	0.546003	0.696997	0		2571	0.590634	0.516048	0.66522	0
Concentration of small HDL particles	3980	1.16374	1.09246	1.23503	0		2571	1.11276	1.04268	1.18284	0
Total lipids in small HDL	3980	-0.36026	-0.43952	-0.281	7.53e-19		2571	-0.466527	-0.543462	-0.389593	8.9e-32
Phospholipids in small HDL	3980	-0.714446	-0.792398	-0.636495	0		2571	-0.73837	-0.814905	-0.661835	0
Total cholesterol in small HDL	3980	-0.0402486	-0.125165	0.0446673	0.352805		2571	-0.201714	-0.283482	-0.119945	1.39e-06
Cholesterol esters in small HDL	3980	0.242643	0.157707	0.327578	2.28e-08		2571	0.0829894	0.0012103	0.164769	0.046707
Free cholesterol in small HDL	3980	-1.19934	-1.27007	-1.12861	0		2571	-1.24926	-1.31848	-1.18003	0
Triglycerides in small HDL	3980	0.961763	0.890188	1.03334	0		2571	0.945643	0.875336	1.01595	0
Phospholipids to total lipds ratio in chylomicrons and extremely large VLDL	3980	-0.0648442	-0.0846113	-0.0450771	1.41e-10		2571	-0.117678	-0.191624	-0.0437315	0.0018252
Total cholesterol to total lipids ratio in chylomicrons and extremely large VLDL	3980	-0.0282007	-0.0380367	-0.0183647	2.03e-08		2571	-0.0245595	-0.0329922	-0.0161268	1.25e-08
Cholesterol esters to total lipids ratio in chylomicrons and extremely large VLDL	3980	-0.111228	-0.150374	-0.0720816	2.71e-08		2571	-0.138346	-0.190823	-0.0858696	2.53e-07
Free cholesterol to total lipids ratio in chylomicrons and extremely large VLDL	3980	-0.027843	-0.0760923	0.0204062	0.257966		2571	-0.0442318	-0.0947423	0.0062787	0.0860744
Triglycerides to total lipids ratio in chylomicrons and extremely large VLDL	3980	0.2201	0.167711	0.272488	2.37e-16		2571	0.20964	0.159899	0.259381	2.22e-16
Phospholipids to total lipds ratio in very large VLDL	3980	0.0059276	-0.0319418	0.043797	0.758948		2571	-0.0055839	-0.0319961	0.0208282	0.678497
Total cholesterol to total lipids ratio in very large VLDL	3980	-0.184979	-0.210767	-0.159191	0		2571	-0.173236	-0.199195	-0.147278	6.31e-38
Cholesterol esters to total lipids ratio in very large VLDL	3980	-0.0581794	-0.0841751	-0.0321837	1.17e-05		2571	-0.0348246	-0.04397	-0.0256792	1.12e-13
Free cholesterol to total lipids ratio in very large VLDL	3980	-0.158708	-0.265121	-0.0522939	0.0034749		2571	-0.114276	-0.128656	-0.0998962	0
Triglycerides to total lipids ratio in very large VLDL	3980	0.0310734	-0.0066809	0.0688277	0.106688		2571	0.0258403	0.0027129	0.0489678	0.028548
Phospholipids to total lipds ratio in large VLDL	3980	0.274174	0.223222	0.325125	1.11e-25		2571	0.220633	0.171659	0.269608	1.84e-18
Total cholesterol to total lipids ratio in large VLDL	3980	-0.0081735	-0.067158	0.050811	0.785886		2571	-0.0404492	-0.0980619	0.0171636	0.16872
Cholesterol esters to total lipids ratio in large VLDL	3980	-0.143504	-0.202801	-0.0842075	2.16e-06		2571	-0.145516	-0.20278	-0.0882514	6.68e-07
Free cholesterol to total lipids ratio in large VLDL	3980	0.183936	0.126551	0.241321	3.65e-10		2571	0.133076	0.0817346	0.184417	3.99e-07
Triglycerides to total lipids ratio in large VLDL	3980	-0.110592	-0.188993	-0.0321901	0.0057093		2571	-0.0770985	-0.12162	-0.0325772	0.0006949
Phospholipids to total lipds ratio in medium VLDL	3980	-0.741662	-0.804342	-0.678982	0		2571	-0.798463	-0.857878	-0.739048	0
Total cholesterol to total lipids ratio in medium VLDL	3980	-0.754919	-0.811053	-0.698785	0		2571	-0.783621	-0.840065	-0.727177	0
Cholesterol esters to total lipids ratio in medium VLDL	3980	-0.748892	-0.806809	-0.690974	0		2571	-0.771697	-0.829313	-0.71408	0
Free cholesterol to total lipids ratio in medium VLDL	3980	-0.0021318	-0.0620314	0.0577677	0.944376		2571	-0.0325231	-0.0893167	0.0242706	0.261581
Triglycerides to total lipids ratio in medium VLDL	3980	0.818829	0.76113	0.876528	0		2571	0.848722	0.791831	0.905614	0
Phospholipids to total lipds ratio in small VLDL	3980	-0.263484	-0.329776	-0.197191	8.34e-15		2571	-0.236295	-0.301977	-0.170614	2.22e-12
Total cholesterol to total lipids ratio in small VLDL	3980	-1.43057	-1.48454	-1.37661	0		2571	-1.47914	-1.5321	-1.42617	0
Cholesterol esters to total lipids ratio in small VLDL	3980	-1.31405	-1.37066	-1.25745	0		2571	-1.3633	-1.41887	-1.30773	0
Free cholesterol to total lipids ratio in small VLDL	3980	-1.62135	-1.67258	-1.57011	0		2571	-1.64362	-1.69488	-1.59236	0
Triglycerides to total lipids ratio in small VLDL	3980	1.52297	1.46794	1.578	0		2571	1.56514	1.51122	1.61906	0
Phospholipids to total lipds ratio in very small VLDL	3980	0.915984	0.843513	0.988455	0		2571	0.842201	0.770838	0.913564	0
Total cholesterol to total lipids ratio in very small VLDL	3980	-1.44759	-1.50439	-1.3908	0		2571	-1.44137	-1.49655	-1.38618	0
Cholesterol esters to total lipids ratio in very small VLDL	3980	-1.42532	-1.48195	-1.3687	0		2571	-1.40727	-1.46297	-1.35157	0
Free cholesterol to total lipids ratio in very small VLDL	3980	-0.929201	-1.00337	-0.855031	0		2571	-0.972399	-1.0422	-0.9026	0
Triglycerides to total lipids ratio in very small VLDL	3980	1.1578	1.08597	1.22963	0		2571	1.18477	1.11488	1.25466	0
Phospholipids to total lipds ratio in IDL	3980	0.698692	0.633792	0.763591	0		2571	0.730633	0.667005	0.794262	0
Total cholesterol to total lipids ratio in IDL	3980	-0.633097	-0.705559	-0.560635	0		2571	-0.685055	-0.755071	-0.61504	0
Cholesterol esters to total lipids ratio in IDL	3980	-0.464314	-0.534474	-0.394155	9.82e-38		2571	-0.515212	-0.583737	-0.446686	0
Free cholesterol to total lipids ratio in IDL	3980	-0.571982	-0.656941	-0.487023	0		2571	-0.593266	-0.676439	-0.510093	0
Triglycerides to total lipids ratio in IDL	3980	0.398231	0.319945	0.476518	3.73e-23		2571	0.442136	0.367276	0.516996	2.86e-30
Phospholipids to total lipds ratio in large LDL	3980	-0.0166435	-0.0902583	0.0569712	0.6576		2571	0.0621024	-0.0093709	0.133576	0.0885403
Total cholesterol to total lipids ratio in large LDL	3980	0.196892	0.118112	0.275673	9.97e-07		2571	0.108792	0.0336954	0.183889	0.0045365
Cholesterol esters to total lipids ratio in large LDL	3980	0.459615	0.386628	0.532601	2.17e-34		2571	0.357633	0.288092	0.427173	1.76e-23
Free cholesterol to total lipids ratio in large LDL	3980	-0.760676	-0.831508	-0.689843	0		2571	-0.705952	-0.774481	-0.637422	0
Triglycerides to total lipids ratio in large LDL	3980	-0.281857	-0.358602	-0.205112	7.14e-13		2571	-0.218974	-0.290945	-0.147003	2.77e-09
Phospholipids to total lipds ratio in medium LDL	3980	-0.161384	-0.240504	-0.0822637	6.48e-05		2571	-0.083457	-0.160421	-0.0064933	0.0335713
Total cholesterol to total lipids ratio in medium LDL	3980	0.189468	0.106398	0.272538	7.98e-06		2571	0.0966328	0.0167316	0.176534	0.0177891
Cholesterol esters to total lipids ratio in medium LDL	3980	0.398631	0.321593	0.475669	6.81e-24		2571	0.300519	0.226333	0.374705	2.92e-15
Free cholesterol to total lipids ratio in medium LDL	3980	-0.698744	-0.761622	-0.635866	0		2571	-0.609169	-0.669939	-0.5484	0
Triglycerides to total lipids ratio in medium LDL	3980	-0.141976	-0.220126	-0.0638258	0.0003727		2571	-0.071208	-0.145167	0.0027511	0.0591457
Phospholipids to total lipds ratio in small LDL	3980	-0.143211	-0.221727	-0.0646956	0.000353		2571	-0.053195	-0.129044	0.0226541	0.169182
Total cholesterol to total lipids ratio in small LDL	3980	-0.0512229	-0.138057	0.0356116	0.247539		2571	-0.141993	-0.225815	-0.0581708	0.0009072
Cholesterol esters to total lipids ratio in small LDL	3980	0.287683	0.207163	0.368202	2.89e-12		2571	0.188966	0.111456	0.266475	1.85e-06
Free cholesterol to total lipids ratio in small LDL	3980	-0.918066	-0.977018	-0.859114	0		2571	-0.836159	-0.892817	-0.779502	0
Triglycerides to total lipids ratio in small LDL	3980	0.410994	0.326248	0.495741	3.26e-21		2571	0.457431	0.375787	0.539075	1.8e-27
Phospholipids to total lipds ratio in very large HDL	3980	0.0223076	-0.0761473	0.120762	0.656909		2571	0.0602228	-0.0375428	0.157988	0.2272
Total cholesterol to total lipids ratio in very large HDL	3980	-0.398384	-0.489047	-0.307721	9.94e-18		2571	-0.43114	-0.520883	-0.341398	9.67e-21
Cholesterol esters to total lipids ratio in very large HDL	3980	-0.296819	-0.3889	-0.204738	2.91e-10		2571	-0.329371	-0.420446	-0.238295	1.71e-12
Free cholesterol to total lipids ratio in very large HDL	3980	-0.567439	-0.668486	-0.466391	8.62e-28		2571	-0.579297	-0.679763	-0.478831	5.82e-29
Triglycerides to total lipids ratio in very large HDL	3980	0.644268	0.567643	0.720893	0		2571	0.624075	0.543042	0.705108	0
Phospholipids to total lipds ratio in large HDL	3980	1.05112	0.971527	1.13072	0		2571	0.977269	0.898749	1.05579	0
Total cholesterol to total lipids ratio in large HDL	3980	-1.03499	-1.11734	-0.95265	0		2571	-0.972681	-1.05477	-0.890595	0
Cholesterol esters to total lipids ratio in large HDL	3980	-0.879473	-0.9589	-0.800046	0		2571	-0.807522	-0.887061	-0.727983	0
Free cholesterol to total lipids ratio in large HDL	3980	-1.25008	-1.34395	-1.15621	0		2571	-1.21224	-1.30557	-1.11891	0
Triglycerides to total lipids ratio in large HDL	3980	0.399945	0.299591	0.500299	7.07e-15		2571	0.396475	0.296183	0.496768	1.3e-14
Phospholipids to total lipds ratio in medium HDL	3980	0.158795	0.0813197	0.23627	5.97e-05		2571	0.166554	0.089372	0.243736	2.4e-05
Total cholesterol to total lipids ratio in medium HDL	3980	-0.944793	-1.02522	-0.864367	0		2571	-0.942054	-1.02238	-0.861724	0
Cholesterol esters to total lipids ratio in medium HDL	3980	-0.546798	-0.627236	-0.46636	0		2571	-0.528314	-0.608001	-0.448626	1.81e-37
Free cholesterol to total lipids ratio in medium HDL	3980	-1.58071	-1.65374	-1.50768	0		2571	-1.62452	-1.69577	-1.55326	0
Triglycerides to total lipids ratio in medium HDL	3980	1.29338	1.21867	1.3681	0		2571	1.28322	1.20861	1.35784	0
Phospholipids to total lipds ratio in small HDL	3980	-0.742992	-0.823329	-0.662655	0		2571	-0.60919	-0.687597	-0.530783	0
Total cholesterol to total lipids ratio in small HDL	3980	0.329894	0.241899	0.41789	2.39e-13		2571	0.193755	0.10761	0.279901	1.07e-05
Cholesterol esters to total lipids ratio in small HDL	3980	0.565634	0.47993	0.651338	1.53e-37		2571	0.43264	0.348775	0.516505	1.3e-23
Free cholesterol to total lipids ratio in small HDL	3980	-1.56849	-1.62578	-1.5112	0		2571	-1.48991	-1.5457	-1.43412	0
Triglycerides to total lipids ratio in small HDL	3980	1.21112	1.13661	1.28563	0		2571	1.22607	1.15225	1.2999	0
Mean diameter for VLDL particles	3980	1.30417	1.2383	1.37004	0		2571	1.29675	1.23236	1.36114	0
Mean diameter for LDL particles	3980	-0.876604	-0.947112	-0.806097	0		2571	-0.802724	-0.870742	-0.734706	0
Mean diameter for HDL particles	3980	-1.23593	-1.29763	-1.17423	0		2571	-1.19161	-1.25182	-1.1314	0
Serum total cholesterol	3980	-0.749288	-0.823883	-0.674693	0		2571	-0.890383	-0.963248	-0.817518	0
Total cholesterol in VLDL	3980	-0.0017005	-0.0772147	0.0738137	0.964788		2571	-0.103464	-0.178797	-0.0281309	0.0071246
Remnant cholesterol (non-HDL, non-LDL -cholesterol)	3980	-0.296584	-0.369826	-0.223342	2.63e-15		2571	-0.427266	-0.499891	-0.354641	4.71e-30
Total cholesterol in LDL	3980	-0.130645	-0.21126	-0.0500303	0.0014979		2571	-0.284701	-0.363234	-0.206167	1.51e-12
Total cholesterol in HDL	3980	-1.40223	-1.46349	-1.34097	0		2571	-1.4144	-1.47501	-1.35379	0
Total cholesterol in HDL2	3980	-1.27027	-1.33437	-1.20616	0		2571	-1.27141	-1.33489	-1.20793	0
Total cholesterol in HDL3	3980	-1.7982	-1.8422	-1.7542	0		2571	-1.8662	-1.90872	-1.82369	0
Esterified cholesterol	3980	-0.763331	-0.838052	-0.688611	0		2571	-0.897651	-0.970632	-0.824669	0
Free cholesterol	3980	-0.688155	-0.763678	-0.612633	0		2571	-0.841329	-0.915185	-0.767473	0
Serum total triglycerides	3980	0.765853	0.686944	0.844762	0		2571	0.721185	0.643494	0.798875	0
Triglycerides in VLDL	3980	0.927336	0.848478	1.00619	0		2571	0.888925	0.811303	0.966548	0
Triglycerides in LDL	3980	-0.278732	-0.354429	-0.203035	6.24e-13		2571	-0.354909	-0.426736	-0.283083	7.9e-22
Triglycerides in HDL	3980	0.0370504	-0.0436048	0.117706	0.367846		2571	0.0467359	-0.0327571	0.126229	0.249077
Diacylglycerol	3980	0.529716	0.431544	0.627887	8.21e-26		2571	0.456979	0.360749	0.553209	2.61e-20
Ratio of diacylglycerol to triglycerides	3980	0.427836	0.337822	0.51785	1.9e-20		2571	0.372169	0.281442	0.462895	1.32e-15
Total phosphoglycerides	3980	-0.925219	-0.997525	-0.852912	0		2571	-1.01474	-1.08441	-0.945068	0
Ratio of triglycerides to phosphoglycerides	3980	0.91011	0.827478	0.992742	0		2571	0.894233	0.812722	0.975745	0
Phosphatidylcholine and other cholines	3980	-1.12602	-1.19275	-1.05929	0		2571	-1.1872	-1.2518	-1.12259	0
Total cholines	3980	-1.09331	-1.16213	-1.02449	0		2571	-1.17665	-1.24318	-1.11013	0
Apolipoprotein A-I	3980	-1.40661	-1.46911	-1.34411	0		2571	-1.4576	-1.51886	-1.39635	0
Apolipoprotein B	3980	-0.0415706	-0.116996	0.0338545	0.279956		2571	-0.170552	-0.244228	-0.0968748	5.91e-06
Ratio of apolipoprotein B to apolipoprotein A-I	3980	0.782673	0.708214	0.857132	0		2571	0.691743	0.618315	0.765171	0
Total fatty acids	3980	-0.524811	-0.600683	-0.448939	0		2571	-0.624463	-0.698624	-0.550302	0
Estimated description of fatty acid chain length, not actual carbon number	3980	1.01396	0.936669	1.09126	0		2571	1.03959	0.964359	1.11483	0
Estimated degree of unsaturation	3980	-0.0722738	-0.160339	0.0157915	0.107695		2571	-0.0549539	-0.142246	0.0323387	0.217148
22:6, docosahexaenoic acid	3980	-0.923468	-1.00134	-0.845596	0		2571	-0.936223	-1.01285	-0.859597	0
18:2, linoleic acid	3980	-0.723982	-0.797377	-0.650587	0		2571	-0.818092	-0.889752	-0.746433	0
Conjugated linoleic acid	3980	0.225861	0.149304	0.302418	7.85e-09		2571	0.163307	0.0849562	0.241658	4.5e-05
Omega-3 fatty acids	3980	-0.715101	-0.793727	-0.636475	0		2571	-0.757298	-0.836439	-0.678158	0
Omega-6 fatty acids	3980	-0.799127	-0.871539	-0.726714	0		2571	-0.906397	-0.976657	-0.836137	0
Polyunsaturated fatty acids	3980	-0.825069	-0.897656	-0.752483	0		2571	-0.927445	-0.997863	-0.857027	0
Monounsaturated fatty acids; 16:1, 18:1	3980	-0.0625541	-0.144387	0.0192786	0.134036		2571	-0.169703	-0.250704	-0.0887023	4.11e-05
Saturated fatty acids	3980	-0.583899	-0.661353	-0.506445	0		2571	-0.655389	-0.731125	-0.579652	0
Ratio of 22:6 docosahexaenoic acid to total fatty acids	3980	-0.77416	-0.856029	-0.69229	0		2571	-0.704933	-0.78564	-0.624226	0
Ratio of 18:2 linoleic acid to total fatty acids	3980	-0.336708	-0.421985	-0.251432	1.24e-14		2571	-0.32664	-0.41139	-0.241891	5.68e-14
Ratio of conjugated linoleic acid to total fatty acids	3980	0.399305	0.324092	0.474517	4.74e-25		2571	0.373392	0.297622	0.449162	1.01e-21
Ratio of omega-3 fatty acids to total fatty acids	3980	-0.470134	-0.550987	-0.389281	1.2e-29		2571	-0.417411	-0.499326	-0.335496	4.34e-23
Ratio of omega-6 fatty acids to total fatty acids	3980	-0.511519	-0.59962	-0.423418	1.45e-29		2571	-0.514751	-0.602132	-0.427371	3.98e-30
Ratio of polyunsaturated fatty acids to total fatty acids	3980	-0.605016	-0.692604	-0.517427	0		2571	-0.593498	-0.680114	-0.506881	0
Ratio of monounsaturated fatty acids to total fatty acids	3980	0.804228	0.717023	0.891433	0		2571	0.733125	0.646328	0.819922	0
Ratio of saturated fatty acids to total fatty acids	3980	-0.38053	-0.479045	-0.282016	4.51e-14		2571	-0.272091	-0.368951	-0.175232	3.98e-08
Glucose	3980	-0.24179	-0.328046	-0.155534	4.13e-08		2571	-0.310515	-0.39522	-0.225811	8.56e-13
Lactate	3980	0.785954	0.698757	0.873152	0		2571	0.777064	0.68995	0.864179	0
Citrate	3980	1.24177	1.177	1.30653	0		2571	1.22075	1.15807	1.28344	0
Alanine	3980	1.3673	1.29858	1.43602	0		2571	1.38394	1.31666	1.45122	0
Glutamine	3980	0.416621	0.33615	0.497091	6.44e-24		2571	0.274275	0.196554	0.351996	5.69e-12
Histidine	3980	0.0561084	-0.0214931	0.13371	0.156401		2571	-0.013987	-0.0876201	0.0596461	0.709565
Isoleucine	3980	1.46102	1.39027	1.53176	0		2571	1.45076	1.38084	1.52068	0
Leucine	3980	1.67214	1.59864	1.74565	0		2571	1.66272	1.5897	1.73574	0
Valine	3980	0.693278	0.613779	0.772778	0		2571	0.599478	0.520961	0.677995	0
Phenylalanine	3980	1.47251	1.41234	1.53269	0		2571	1.43407	1.37416	1.49397	0
Tyrosine	3980	-0.0692917	-0.147524	0.0089408	0.0825531		2571	-0.0969544	-0.174539	-0.0193701	0.014334
Acetate	3980	-0.45412	-0.504648	-0.403593	0		2571	-0.535755	-0.585613	-0.485897	0
Acetoacetate	0						0
3-hydroxybutyrate	3980	0.0404385	-0.0286636	0.109541	0.251319		2571	0.0768331	0.0117574	0.141909	0.0206824
Creatinine	3980	0.537665	0.457617	0.617713	8.54e-39		2571	0.494001	0.415723	0.572278	3.31e-34
Albumin (signal area)	3980	-0.610995	-0.689436	-0.532554	0		2571	-0.830109	-0.90586	-0.754357	0
Glycoprotein acetyls, mainly a1-acid glycoprotein	3980	0.0806124	-0.0033163	0.164541	0.0597607		2571	-0.0530437	-0.135438	0.0293508	0.206928
